# Supplementary material
Source: PubMed Central journal article supplement (PMC10393418)
Supplement: awad060_supplementary_data.pdf [file awad060_supplementary_data.pdf]

|          |                                                                                                                                                                                                                                                                                                                                                                                                                                                                                                                                                                                                                                   |
|----------|-----------------------------------------------------------------------------------------------------------------------------------------------------------------------------------------------------------------------------------------------------------------------------------------------------------------------------------------------------------------------------------------------------------------------------------------------------------------------------------------------------------------------------------------------------------------------------------------------------------------------------------|
| <b>A</b> | AKT1, AKT1S1, AKT2, AKT3, ASCL1, BRAF, CAB39, CAB39L, DDIT4, DEPDC5, Delta1, EIF4B, EIF4E, EIF4E1B, EIF4E2, EIF4EBP1, FOXG1, GSk3, HIF1A, ID1-4, IGF1, IKBKB, INS, IRS1, MAPK1, MAPK3, MIOS, MLST8, MTOR, NEUROD1, NEUROG1, NEUROG2, NPRL2, NPRL3, PDPK1, PIK3C2B, PIK3C3, PIK3CA, PIK3CB, PIK3CD, PIK3CG, PIK3R1, PIK3R2, PIK3R3, PIK3R5, PRKAA1, PRKAA2, PRKCA, PRKCB, PRKCG, PTEN, RAB6B, RALA, RHEB, RICTOR, RND1-3, RPS6, RPS6KA1, RPS6KA2, RPS6KA3, RPS6KA6, RPS6KB1, RPS6KB2, RPTOR, RRAGA, RRAGB, RRAGC, RRAGD, SEC13, SEH1L, STK11, STRADA, TBR2, TNF, TSC1, TSC2, ULK1, ULK2, ULK3, VEGFA, WDR24, WDR59, ZBTB18, ZNF337 |
| <b>B</b> | C3orf33, GJA1, KCNAB1, SLC33A1                                                                                                                                                                                                                                                                                                                                                                                                                                                                                                                                                                                                    |
| <b>C</b> | ATXN1, BCL11A, FANCL, GABRA2, GRIK1, KCNN2, PCDH7, PNPO, SCN1A, SCN2A, SCN3A, STAT4, STX1B, TTC21B, ZEB2                                                                                                                                                                                                                                                                                                                                                                                                                                                                                                                          |
| <b>D</b> | FANCL, BCL11A, SCN3A, SCN2A, TTC21B, SCN1A, HEATR3, BRD7                                                                                                                                                                                                                                                                                                                                                                                                                                                                                                                                                                          |
| <b>E</b> | C8orf74, KIZ, KMT2E, LOC102723661, MACROD2, NKX2-2, NKX2-4, PINX1, PTBP2, SOX7, SRPK2, XRN2                                                                                                                                                                                                                                                                                                                                                                                                                                                                                                                                       |
| <b>F</b> | ADCY2, ADD3, ANK3, CACNA1C, CD47, FADS2, FSTL5, GRIN2A, HDAC5, ITIH1, LMAN2L, MRPS33, NCAN, PACS1, PC, PLEKHO1, POU3F2, RIMS1, RPS6KA2, SCN2A, SHANK2, SRPK2, SSBP2, STARD9, STK4, THSD7A, TRANK1, ZCCHC2, ZNF592                                                                                                                                                                                                                                                                                                                                                                                                                 |
| <b>G</b> | BTNL2, C9orf72, GRN, HLA-DRA, HLA-DRB5, MAPT                                                                                                                                                                                                                                                                                                                                                                                                                                                                                                                                                                                      |

**Supplemental Table 1.** The lists of candidate genes used for disease specificity analysis presented in Figure 3 for focal cortical dysplasia (**A**), hippocampal sclerosis (**B**), generalized epilepsy (**C**), all epilepsy (**D**), autism spectrum disorder (**E**), bipolar disorder (**F**) and frontotemporal dementia (**G**).

|       | Epilepsy          | Generalized epilepsy | Hippocampal sclerosis | Autism spectrum disorder | Bipolar disorder  | Frontotemporal dementia |
|-------|-------------------|----------------------|-----------------------|--------------------------|-------------------|-------------------------|
| PLS-1 | -2.954<br>(0.003) | -1.629<br>(0.105)    | -1.345<br>(0.185)     | 0.041<br>(0.961)         | 0.734<br>(0.473)  | -1.197<br>(0.234)       |
| PLS-2 | -2.560<br>(0.014) | -2.348<br>(0.026)    | -1.009<br>(0.303)     | 0.028<br>(0.988)         | -0.786<br>(0.434) | -0.523<br>(0.579)       |

**Supplemental Table 2.** Enrichment ratio (uncorrected p value) of GWAS-derived risk genes used for disease specificity analysis presented in Figure 3.
